# Supplementary material
Source: publisher figshare collection journal article supplement (https://frontiersin.figshare.com/ndownloader/files/30698951)
Supplement: Supplementary file 1 [file 30698951]

Supplementary Material

# Supplementary Text

Supplementary Text 1. Analysis predictions.

*Isotopic dietary analysis (IDA) predictions*

We first examined whether species and year parameters, including their interaction, were important predictors of variation in δ13C and δ15N stable isotope (SI) values of *Pygoscelis* penguin blood tissue (i.e., red blood cell fraction) across four stages of breeding among populations nesting within our northern study area near Anvers Island: adults at the one-egg stage, and their young chicks at five and 15 days of age, as well as older crèched chicks at a population level age of five weeks. We predicted that species differences in SI values would become more similar at later stages of breeding (see references in manuscript Introduction). Additionally, we examined whether regional breeding colony location and year parameters, including their interaction, were important predictors of variation in δ13C and δ15N SI values of older Adélie penguin chicks at five weeks of age, predicting that individual chicks from southern colonies would have higher isotopic values relative to their northern conspecifics (again, see references in manuscript Introduction). Although we discuss yearly variation in penguin SI values within the context of qualitative variation in the previous winter’s average sea ice coverage, we made no *a priori* predictions regarding these relationships given that isotopic perspectives of this predator-prey system have not been explored in detail at this level.

*Trophic position analysis (TPA) predictions*

We examined species and year differences in trophic level of five-week-old crèched *Pygoscelis* penguin chicks reared at Anvers Island, as well as location and year differences among crèched Adélie penguin chicks reared from regional breeding colonies. Analyses are based on individual differences in δ15N values between penguin chicks and the base of regional food webs established using δ15N values of a primary consumer (Antarctic krill) collected from each region. Similar to IN analyses, we predicted that five-week-old crèched *Pygoscelis* penguin chicks at Anvers Island would occupy similar trophic levels, however, crèched Adélie penguin chicks at regional colonies would occupy higher trophic levels at southern breeding colonies. These predictions are based on the literature references identified in the Introduction of the main manuscript.

*Isotopic mixing model analysis (IMMA) predictions*

We employed isotopic mixing models within a Bayesian framework to provide yearly quantitative estimates of the proportion of dietary items used to provision older crèched *Pygoscelis* penguin chicks at five weeks of age at regional colonies. We predicted that *Pygoscelis* chicks reared near Anvers Island in the north would be provisioned similar proportions of various krill species and mesopelagic myctophid fish. However, Adélie penguin chicks reared from southern colonies would consume higher proportions of notothenoid fish, as well as crystal krill. Again, these predictions are based on the literature references identified in the Introduction of the main manuscript.

*Isotopic niche analysis (INA) predictions*

Lastly, we examined total isotopic area, as a proxy for dietary niche width, among five-week-old crèched *Pygoscelis* penguin chicks using a Bayesian-derived metric for standard ellipse area (‰2) based on δ13C and δ15N values of red blood cell tissue. We predicted that southwestern AP penguin chicks at Avian and Charcot Islands should have a larger isotopic area than chicks reared near Anvers Island given the importance of higher trophic level prey in these regions to penguin predators. Predictions follow from the literature references identified in the Introduction of the main manuscript.

# Supplementary Tables and Figures

Supplementary Table 1. Average percentage of diet for prey items of adult *Pygoscelis* penguins provisioning chicks. The *Other* category includes any secondary prey components as described below.

Diet composition of study populations was based on stomach lavage. Diet samples obtained in the field are initially drained and weighed and returned to the laboratory for further processing where samples are resuspended in fresh water to release fish otoliths and other prey hard parts, and then draining to a consistency that facilitates separating diet samples into sub-samples of primary and secondary prey components. Primary prey components include krill and fish, and secondary prey components may include octopus, squid amphipods, mysid shrimp, limpets and small clams. Each prey component is weighed and, if possible, sorted according to species. See also penguin diet datasets within the PAL-LTER data system, <https://oceaninformatics.ucsd.edu/datazoo/catalogs/pallter/datasets>). Data presented here are percentages of each primary diet item based on weight as a proportion of total diet sample weight.

| Summer season | Region | Species | Number of diet samples per season | Prey item | Size class range1 (mm) | Average percentage of diet |
| --- | --- | --- | --- | --- | --- | --- |
| 2007/08 | Anvers Island | Adelie Penguin | 25 | *E. crystallorophias* | N/A | 0.0% |
|  |  |  |  | *E. superba* | 26-50,  36-40 | 99.8% |
|  |  |  |  | *T. macrura* | N/A | 0.0% |
|  |  |  |  | Fish |  | 0.2% |
|  |  |  |  | Other |  | 0.0% |
|  |  |  |  |  |  |  |
| 2007/08 | Avian Island | Adelie Penguin | 26 | *E. crystallorophias* | N/A | 0.0% |
|  |  |  |  | *E. superba* | N/A | 97.0% |
|  |  |  |  | *T. macrura* | N/A | 0.0% |
|  |  |  |  | Fish |  | 2.9% |
|  |  |  |  | Other |  | 0.0% |
|  |  |  |  |  |  |  |
| 2008/09 | Anvers Island | Adelie Penguin | 17 | *E. crystallorophias* | N/A | 0.0% |
|  |  |  |  | *E. superba* | 26-55,  36-40 | 99.9% |
|  |  |  |  | *T. macrura* | N/A | 0.0% |
|  |  |  |  | Fish |  | 0.1% |
|  |  |  |  | Other |  | 0.0% |
|  |  |  |  |  |  |  |
| 2008/09 | Avian Island | Adelie Penguin | 21 | *E. crystallorophias* | N/A | 0.05% |
|  |  |  |  | *E. superba* | N/A | 98.7% |
|  |  |  |  | *T. macrura* | N/A | 0.02% |
|  |  |  |  | Fish |  | 1.0% |
|  |  |  |  | Other |  | 0.0% |
|  |  |  |  |  |  |  |
| 2009/10 | Anvers Island | Adelie Penguin | 23 | *E. crystallorophias* | N/A | 0.0% |
|  |  |  |  | *E. superba* | 31-55,  46-50 | 99.2% |
|  |  |  |  | *T. macrura* | N/A | 0.4% |
|  |  |  |  | Fish |  | 0.4% |
|  |  |  |  | Other |  | 0.0% |
|  |  |  |  |  |  |  |
| 2009/10 | Avian Island | Adelie Penguin | 20 | *E. crystallorophias* | N/A | 0.0% |
|  |  |  |  | *E. superba* | N/A | 97.9% |
|  |  |  |  | *T. macrura* | N/A | 0.7% |
|  |  |  |  | Fish |  | 0.5% |
|  |  |  |  | Other |  | 0.0% |
|  |  |  |  |  |  |  |
| 2009/10 | Charcot Island | Adelie Penguin | 3 | *E. crystallorophias* | N/A | 99.3% |
|  |  |  |  | *E. superba* | N/A | 0.0% |
|  |  |  |  | *T. macrura* | N/A | 0.0% |
|  |  |  |  | Fish |  | 0.7% |
|  |  |  |  | Other |  | 0.0% |
|  |  |  |  |  |  |  |
| 2009/10 | Anvers Island | Gentoo Penguin | 10 | *E. crystallorophias* | N/A | 0.0% |
|  |  |  |  | *E.superba* | N/A | 94.6% |
|  |  |  |  | *T. macrura* | N/A | 0.0% |
|  |  |  |  | Fish |  | 5.1% |
|  |  |  |  | Other |  | 0.2% |
|  |  |  |  |  |  |  |

1Size class range is reported first as the minimum and maximum size class (mm) of krill for >90% of the samples for a given year, the second range is for the size class with the most number of samples collected for that year.


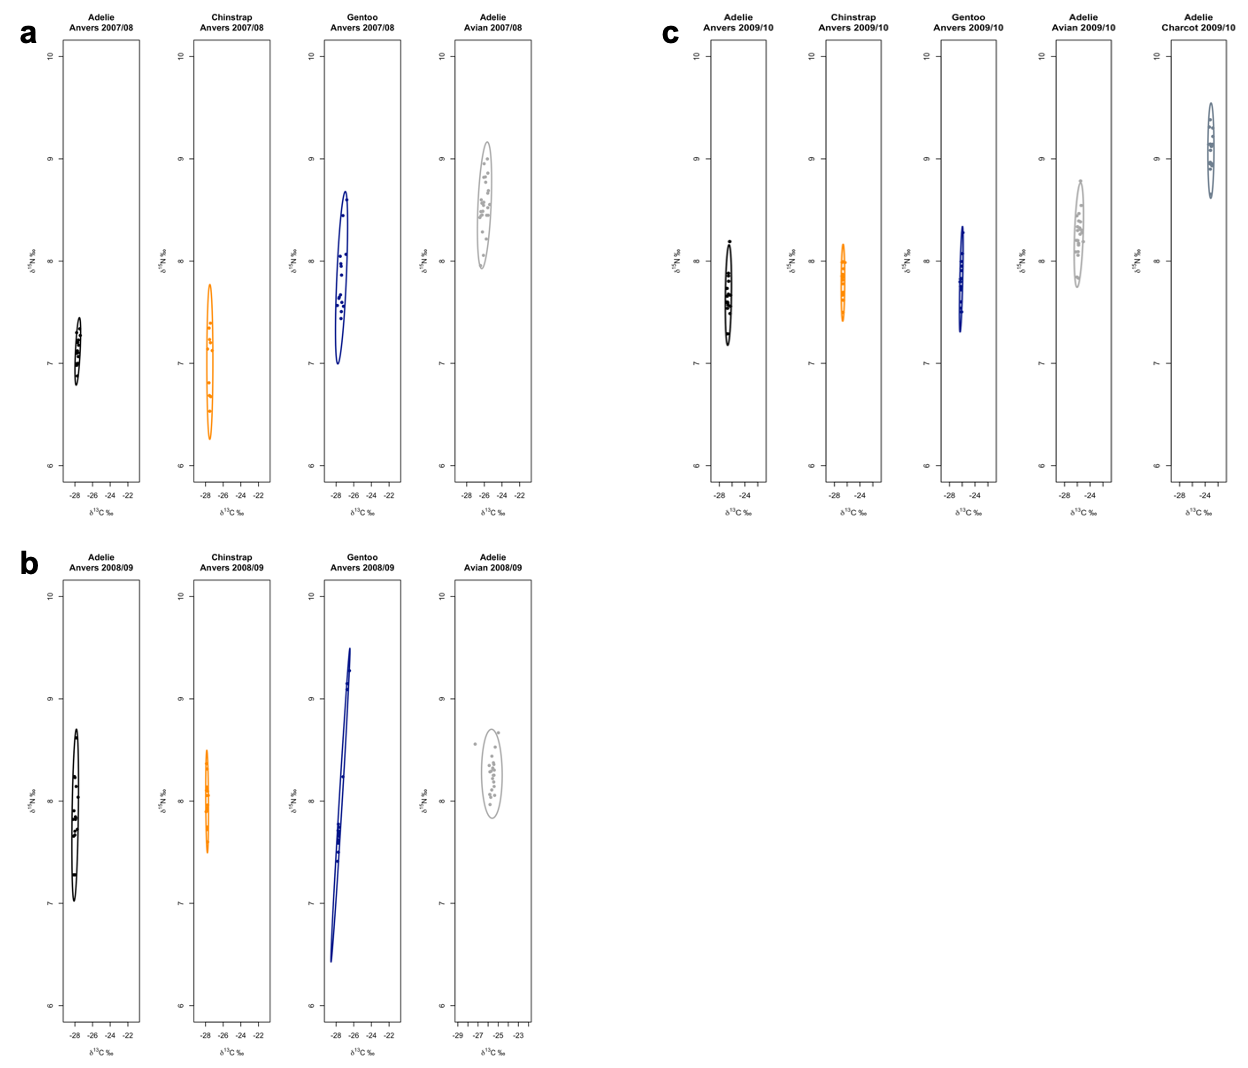


Supplementary Figure 1. Annual variation in Bayesian standard ellipse areas (SEA-B) for five-week-old crèched Adélie (), chinstrap (), and gentoo () penguins at Anvers Island and Adélie penguins at Avian () and Charcot () Islands during (a) 2007/08, (b) 2008/09, and (c) 2009/10.


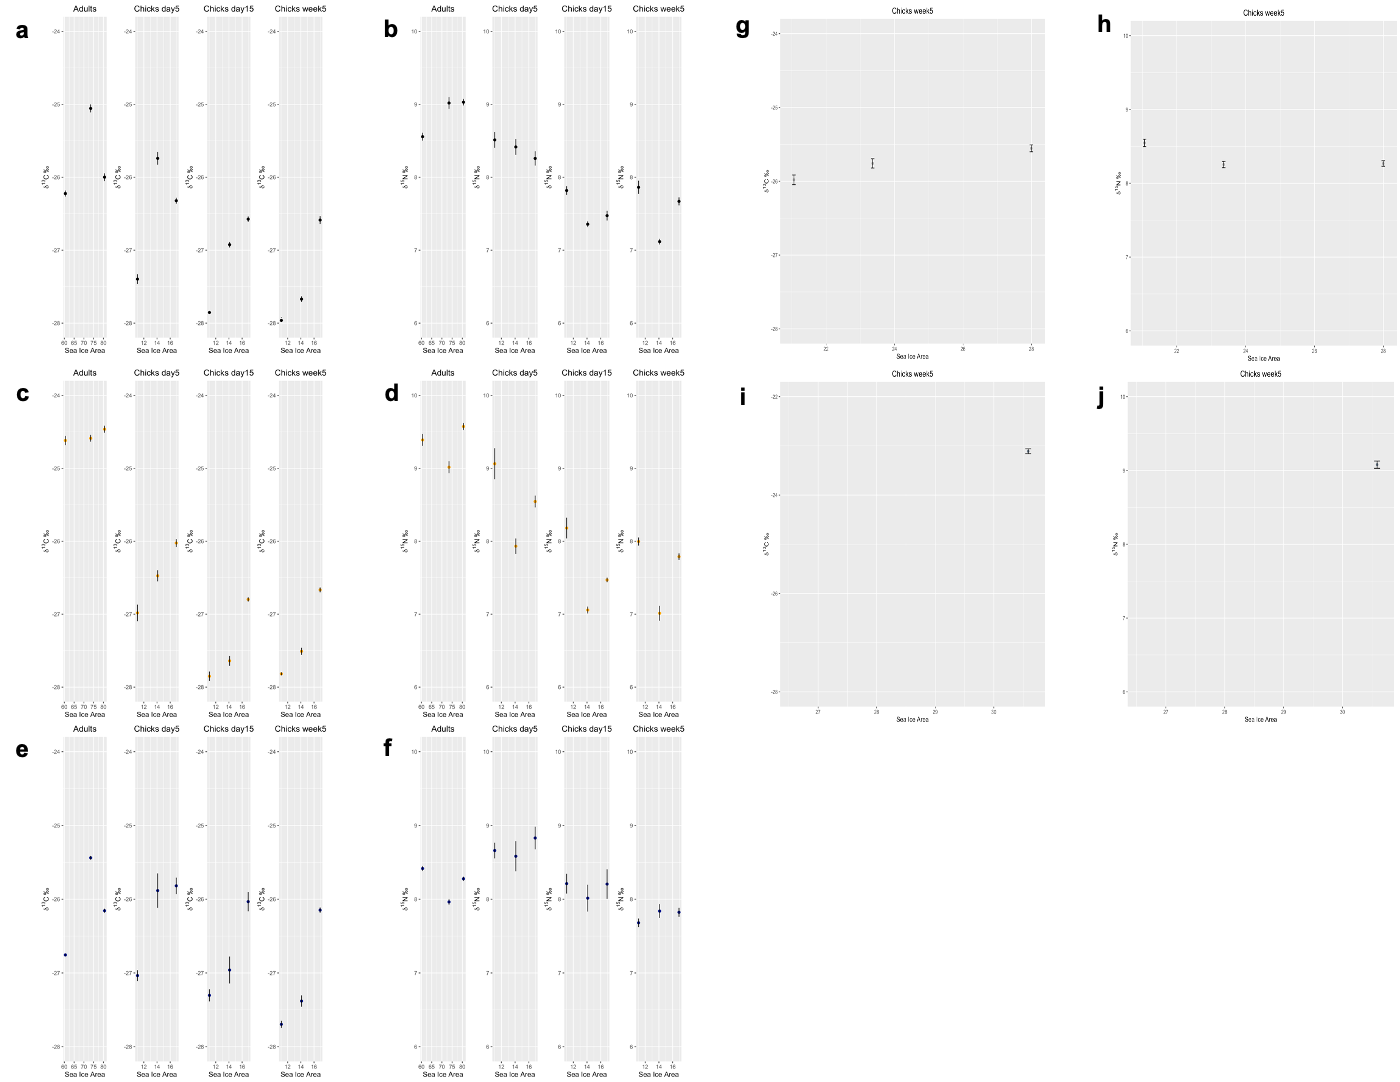


Supplementary Figure 2. Variation in δ13C and δ15N values of *Pygoscelis* penguins of the western Antarctic Peninsula in relation to annual sea ice coverage over the three years of study. Panels (a: δ13C, b: δ15N) for Adélie penguin () adults, day five chicks, day 15 chicks and 5 week chicks, (c: δ13C, d: δ15N) for chinstrap penguin () adults, day five chicks, day 15 chicks and 5 week chicks, (e: δ13C, f: δ15N) for gentoo penguin () adults, day five chicks, day 15 chicks and 5 week chicks at Anvers Island. Panels (g: δ13C , h: δ15N ) for Adélie penguin 5 week chicks at Avian Island () and panels (i: δ13C , j: δ15N) for Adélie penguin 5 week chicks at Charcot Island (). Data for 2007/08, 2008/09, and 2009/10 is shown within each reproductive stage.


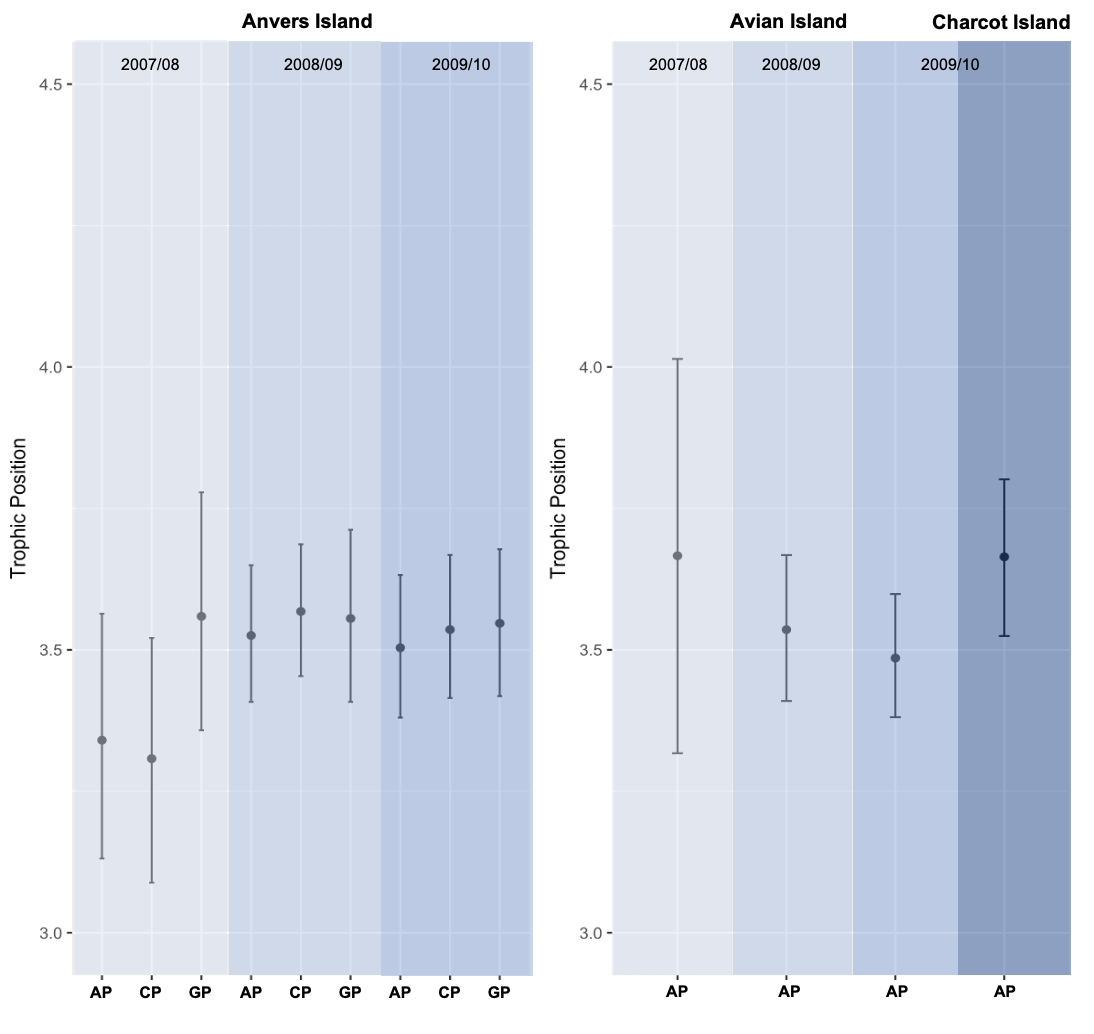


Supplementary Figure 3. Bayesian estimates of trophic position and associated 95% credibility intervals for five-week-old *Pygoscelis* penguin chicks (AP = Adélie, CP = chinstrap, GP = gentoo) reared at breeding colonies throughout the western Antarctic Peninsula (*TPA* models 1-7).


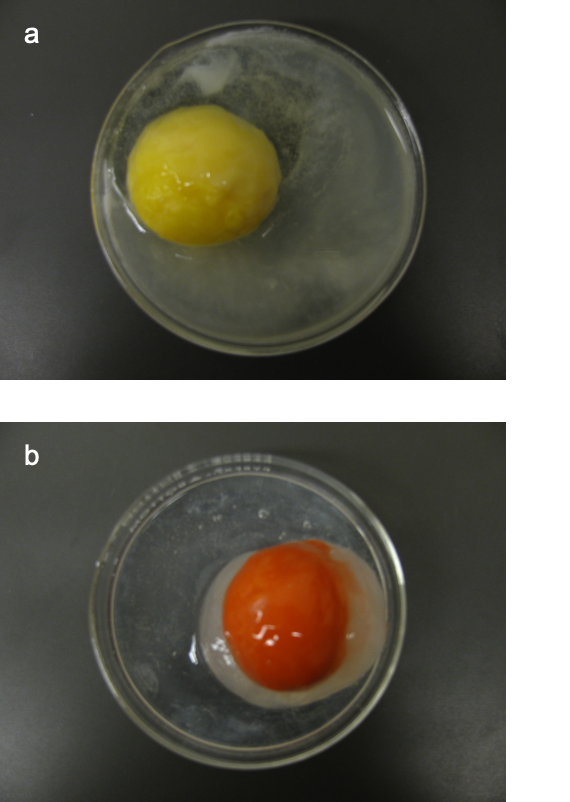


Supplementary Figure 4. Yolk coloration of a) Adélie and b) gentoo penguins. Images taken from addled eggs collected in the field.
